# Supplementary material for: Correlates of Follicular Helper Bias in the CD4 T Cell Response to a Retroviral Antigen
Source: Front Immunol. 2018 Jun 5;9:1260. doi: 10.3389/fimmu.2018.01260 (PMC6008654; doi:10.3389/fimmu.2018.01260)
Supplement: Supplementary file 1 [file Table_1.xlsx]

## Sheet: Table S1
List of genes differentially expressed (>2-fold) between Th0 cells and other Th subsets
Ensembl gene ID	Gene symbol	p-value	q-value	Fold change
ENSMUSG00000092341	Malat1	0.0121141	0.0479678	inf
ENSMUSG00000036478	Btg1	0.0219131	0.0499807	inf
ENSMUSG00000006005	Tpr	0.0270009	0.0499807	3.24512e+282
ENSMUSG00000022462	Slc38a2	0.0128043	0.0479678	1.92454e+213
ENSMUSG00000020719	Ddx5	0.0256262	0.0499807	1.15942e+210
ENSMUSG00000032525	Nktr	0.00229907	0.0479678	8.72919e+179
ENSMUSG00000031362	Xlr4c	0.0440965	0.0499807	2.63181e+166
ENSMUSG00000025085	Ablim1	0.0142002	0.0479678	7.61579e+137
ENSMUSG00000020594	Pum2	0.0440667	0.0499807	2.91189e+131
ENSMUSG00000039997	Ifi203	0.0241039	0.0499807	3.30114e+117
ENSMUSG00000061904	Slc25a3	0.019211	0.0499807	8.65622e+115
ENSMUSG00000024695	Zfp91	0.0237894	0.0499807	3.13658e+112
ENSMUSG00000014956	Ppp1cb	0.0357016	0.0499807	1.36033e+110
ENSMUSG00000052331	Ankrd44	0.0333153	0.0499807	5.24057e+107
ENSMUSG00000026455	Klhl12	0.0296903	0.0499807	6.66823e+99
ENSMUSG00000027540	Ptpn1	0.0137078	0.0479678	1.94045e+99
ENSMUSG00000022280	Rnf19a	0.0268554	0.0499807	3.38895e+86
ENSMUSG00000000378	Ccm2	0.0311326	0.0499807	1.83022e+86
ENSMUSG00000024287	Thoc1	0.0434592	0.0499807	3.48855e+74
ENSMUSG00000050621	Rps27rt	0.037723	0.0499807	6.47952e+63
ENSMUSG00000047879	Usp14	0.0259864	0.0499807	6.31897e+62
ENSMUSG00000031537	Ikbkb	0.0175614	0.0499807	1.28494e+62
ENSMUSG00000042185	Nfrkb	0.0141137	0.0479678	4.6217e+60
ENSMUSG00000023927	Satb1	0.0177362	0.0499807	2.32386e+60
ENSMUSG00000038535	Zfp280d	0.0462901	0.0499807	1.5042e+60
ENSMUSG00000028187	Rpf1	0.00592539	0.0479678	7.60094e+58
ENSMUSG00000032267	Usp28	0.018396	0.0499807	1.49779e+58
ENSMUSG00000019969	Psen1	0.0317242	0.0499807	3.64469e+56
ENSMUSG00000026743	Mllt10	0.0344397	0.0499807	2.56644e+56
ENSMUSG00000027263	Tubgcp4	0.00906824	0.0479678	1.41743e+56
ENSMUSG00000038290	Smg6	0.0356401	0.0499807	4.44984e+53
ENSMUSG00000069729	Arid1b	0.0446109	0.0499807	6.33609e+52
ENSMUSG00000064302	Clasp1	0.0485406	0.0499807	1.11188e+51
ENSMUSG00000090733	Rps27	0.027912	0.0499807	2.20568e+50
ENSMUSG00000027291	Vps39	0.0376553	0.0499807	8.27976e+49
ENSMUSG00000057738	Sptan1	0.0450977	0.0499807	7.54056e+49
ENSMUSG00000079477	Rab7	0.0496881	0.0499807	8.30686e+48
ENSMUSG00000104069	RP23-157N11.10	0.0217239	0.0499807	6.70442e+47
ENSMUSG00000026875	Traf1	0.010931	0.0479678	1.41466e+47
ENSMUSG00000003778	Brd8	0.0423087	0.0499807	1.04775e+46
ENSMUSG00000030615	Tmem126a	0.00722795	0.0479678	3.64306e+45
ENSMUSG00000024182	Axin1	0.0102075	0.0479678	3.85856e+43
ENSMUSG00000022617	Chkb	0.0295594	0.0499807	2.56037e+41
ENSMUSG00000036246	Gmip	0.0111573	0.0479678	4.86719e+38
ENSMUSG00000036376	Abt1	0.0187548	0.0499807	2.76476e+38
ENSMUSG00000030660	Pik3c2a	0.0484863	0.0499807	2.00902e+36
ENSMUSG00000026924	Sec16a	0.026947	0.0499807	4.11438e+35
ENSMUSG00000081357	Xlr4e-ps	0.0453149	0.0499807	9.24615e+32
ENSMUSG00000064145	Arih2	0.0411201	0.0499807	1.70785e+32
ENSMUSG00000091144	Phf11c	0.0426849	0.0499807	6.23504e+31
ENSMUSG00000085245	Gm11713	0.0348722	0.0499807	1.01375e+29
ENSMUSG00000059486	Kbtbd2	0.0266743	0.0499807	7.22755e+28
ENSMUSG00000041890	Git2	0.0144251	0.0479678	1.03249e+27
ENSMUSG00000026035	Ppil3	0.0271225	0.0499807	6.5968e+26
ENSMUSG00000015672	Mrpl32	0.0408695	0.0499807	1.69227e+25
ENSMUSG00000042444	Fam63b	0.0116438	0.0479678	1.83935e+24
ENSMUSG00000028086	Fbxw7	0.0384277	0.0499807	3.83625e+21
ENSMUSG00000024513	Mbd2	0.0398074	0.0499807	8.25122e+20
ENSMUSG00000015605	Srf	0.0478935	0.0499807	2.22763e+20
ENSMUSG00000035885	Cox8a	0.0449582	0.0499807	1.307e+19
ENSMUSG00000030967	Zranb1	0.0400118	0.0499807	3.65239e+18
ENSMUSG00000032705	Exd2	0.0372658	0.0499807	2.37821e+17
ENSMUSG00000037553	Zdhhc18	0.00846351	0.0479678	2.71574e+16
ENSMUSG00000050188	Lsm10	0.0457541	0.0499807	1383998520906560
ENSMUSG00000028563	Tm2d1	0.0321557	0.0499807	685880351846470
ENSMUSG00000090258	Churc1	0.0146704	0.0479678	645797122363889
ENSMUSG00000050428	Fbxo46	0.0449819	0.0499807	1.74699e+13
ENSMUSG00000052812	Atad2b	0.0285435	0.0499807	5.70699e+12
ENSMUSG00000019731	Slc35e1	0.0190047	0.0499807	2.33646e+12
ENSMUSG00000020634	Ubxn2a	0.049118	0.0499807	3.53677e+11
ENSMUSG00000026989	Dapl1	0.0429826	0.0499807	2.39921e+10
ENSMUSG00000031165	Was	0.0415555	0.0499807	2.20552e+09
ENSMUSG00000038976	Ppp1r9b	0.0180648	0.0499807	1.23162e+08
ENSMUSG00000028099	Polr3c	0.0373063	0.0499807	5.75531e+07
ENSMUSG00000040663	Clcf1	0.038653	0.0499807	4.99531e+07
ENSMUSG00000053293	Pom121	0.0372867	0.0499807	2.68445e+07
ENSMUSG00000017132	Cyth1	0.0367919	0.0499807	1.84511e+07
ENSMUSG00000020307	Cdc34	0.0397949	0.0499807	1.49539e+07
ENSMUSG00000051319	1500011K16Rik	0.0248525	0.0499807	277269
ENSMUSG00000045160	Bola3	0.0494531	0.0499807	123723
ENSMUSG00000034837	Gnat1	0.0446501	0.0499807	531.782
ENSMUSG00000038372	Gmds	0.0418512	0.0499807	56.6985
ENSMUSG00000025377	Enthd2	0.0377304	0.0499807	46.9362
ENSMUSG00000083086	Gm15531	0.0183735	0.0499807	26.6475
ENSMUSG00000020156	Mum1	0.0312392	0.0499807	18.199
ENSMUSG00000094842	Gm22639	0.0306893	0.0499807	13.5738
ENSMUSG00000081789	Gm11893	0.0449372	0.0499807	4.69507
ENSMUSG00000093656	Gm20628	0.0481761	0.0499807	3.07658
ENSMUSG00000100551	Gm19503	0.034162	0.0499807	0.496396
ENSMUSG00000100222	Psmb6-ps2	0.0155763	0.0479678	0.44841
ENSMUSG00000069439	Gm8444	0.0214819	0.0499807	0.437999
ENSMUSG00000070778	Rpl7a-ps8	0.0305867	0.0499807	0.426071
ENSMUSG00000089806	Gm16570	0.0336274	0.0499807	0.393605
ENSMUSG00000093282	Gm22566	0.0345891	0.0499807	0.377916
ENSMUSG00000068487	Gm4943	0.00887643	0.0479678	0.361584
ENSMUSG00000092224	Gm8815	0.0254864	0.0499807	0.361577
ENSMUSG00000101610	Gm7560	0.00141273	0.0479678	0.29287
ENSMUSG00000082810	Gm8682	0.000235441	0.0293516	0.270319
ENSMUSG00000092193	Cd9-ps	0.0246539	0.0499807	0.263668
ENSMUSG00000059301	Gm5434	0.0421192	0.0499807	0.258811
ENSMUSG00000092500	Gm20400	0.0355262	0.0499807	0.245096
ENSMUSG00000081416	Gm14383	0.00876084	0.0479678	0.244069
ENSMUSG00000083693	Gm11971	0.0221985	0.0499807	0.237308
ENSMUSG00000082969	Gm12630	0.0449065	0.0499807	0.202947
ENSMUSG00000103979	RP23-172B15.2	0.031467	0.0499807	0.184476
ENSMUSG00000099211	Gm27684	0.00717575	0.0479678	0.181357
ENSMUSG00000089785	Slc25a5-ps	0.00315316	0.0479678	0.145277
ENSMUSG00000095343	Gm6132	0.00330252	0.0479678	0.1397
ENSMUSG00000100701	Gm19587	0.0170082	0.0499807	0.1264
ENSMUSG00000086174	Gm6425	0.00517853	0.0479678	0.124561
ENSMUSG00000083713	Gm5883	0.00806174	0.0479678	0.112871
ENSMUSG00000093152	Gm25032	0.00944953	0.0479678	0.108258
ENSMUSG00000083166	Gm8648	0.000785581	0.0479678	0.0874132
ENSMUSG00000073406	H2-Bl	0.00963481	0.0479678	0.08325
ENSMUSG00000043618	Eif5al3-ps	0.0471265	0.0499807	0.0801645
ENSMUSG00000092243	Gm7030	0.0383639	0.0499807	0.069452
ENSMUSG00000070167	Gm25822	0.0487357	0.0499807	0.0616643
ENSMUSG00000081325	Gm12599	0.0483244	0.0499807	0.0598572
ENSMUSG00000081263	Gm14859	0.0130864	0.0479678	0.0559889
ENSMUSG00000082655	Gm7857	0.024022	0.0499807	0.0298326
ENSMUSG00000097989	Gm4335	0.0169134	0.0499807	0.0297721
ENSMUSG00000100319	Gm5256	0.00460056	0.0479678	0.019538
ENSMUSG00000082013	Gm13216	0.0121863	0.0479678	0.0132686
ENSMUSG00000089988	Gm16238	0.0050546	0.0479678	0.0116227
ENSMUSG00000074092	Gm6181	0.0246964	0.0499807	0.00907528
ENSMUSG00000031826	Usp10	0.0408434	0.0499807	0.00799449
ENSMUSG00000021958	Pinx1	0.0293069	0.0499807	0.0079937
ENSMUSG00000078875	Gm14419	0.039142	0.0499807	0.00569157
ENSMUSG00000078877	Gm14295	0.0305311	0.0499807	0.00465768
ENSMUSG00000059343	Aldoart1	0.0148606	0.0479678	0.00307523
ENSMUSG00000100007	Gm5527	0.0295988	0.0499807	0.00257878
ENSMUSG00000082109	Rpl19-ps12	0.00188543	0.0479678	0.00239318
ENSMUSG00000093148	Gm23375	0.00849941	0.0479678	0.0010699
ENSMUSG00000058833	2810428I15Rik	0.0459482	0.0499807	0.000365714
ENSMUSG00000101209	Gm8524	0.00774796	0.0479678	0.000338734
ENSMUSG00000089698	Gm2541	0.0404746	0.0499807	0.000314218
ENSMUSG00000082241	Gm15776	0.014254	0.0479678	0.0002919
ENSMUSG00000082516	Gm13342	0.0137984	0.0479678	0.000282464
ENSMUSG00000076492	Trbj2-1	0.0243122	0.0499807	0.000224357
ENSMUSG00000062691	Cebpzos	0.0203232	0.0499807	0.000218323
ENSMUSG00000000204	Slfn4	0.0376083	0.0499807	6.62285e-05
ENSMUSG00000060730	Gm10086	0.00840125	0.0479678	4.56996e-05
ENSMUSG00000031691	Tnpo2	0.0387504	0.0499807	4.24619e-05
ENSMUSG00000091639	Gm3756	0.00966279	0.0479678	2.86653e-05
ENSMUSG00000082705	Gm15616	0.0252097	0.0499807	2.78476e-05
ENSMUSG00000025922	Gm5045	0.0306375	0.0499807	2.43645e-05
ENSMUSG00000083773	Gm13394	0.013793	0.0479678	2.25639e-05
ENSMUSG00000089993	Gm5822	0.0179714	0.0499807	1.93047e-05
ENSMUSG00000072978	Gm5830	0.026438	0.0499807	1.09112e-05
ENSMUSG00000078965	Gm12033	0.0125218	0.0479678	1.08267e-05
ENSMUSG00000091269	Gm6682	0.0088808	0.0479678	2.16103e-06
ENSMUSG00000082284	H3f3a-ps1	0.00816946	0.0479678	1.64121e-06
ENSMUSG00000104126	RP24-252K15.3	0.0147111	0.0479678	1.15984e-06
ENSMUSG00000081176	H3f3a-ps2	0.0138638	0.0479678	8.45218e-07
ENSMUSG00000080021	Gm5915	0.028562	0.0499807	7.44749e-07
ENSMUSG00000096173	Gm3150	0.0152713	0.0479678	3.24647e-07
ENSMUSG00000094932	Gm2007	0.0490594	0.0499807	1.5874e-07
ENSMUSG00000082029	H3f3c	0.0109796	0.0479678	6.83327e-08
ENSMUSG00000096789	Gm10257	0.0134079	0.0479678	3.83833e-08
ENSMUSG00000101841	Gm11993	0.0427448	0.0499807	2.98046e-08
ENSMUSG00000060680	Gm8894	0.0294128	0.0499807	1.43845e-08
ENSMUSG00000063314	Gm12657	0.00803157	0.0479678	1.41133e-08
ENSMUSG00000093686	Gm4705	0.0291166	0.0499807	1.67699e-09
ENSMUSG00000080896	Gm14567	0.0309116	0.0499807	1.55259e-09
ENSMUSG00000083669	Gm10169	0.0496005	0.0499807	9.46933e-10
ENSMUSG00000058050	Gm9234	0.0459626	0.0499807	8.11391e-10
ENSMUSG00000078899	Gm4631	0.0261616	0.0499807	5.85544e-10
ENSMUSG00000027694	Gm8325	0.0393328	0.0499807	4.95543e-10
ENSMUSG00000078878	Gm14305	0.0468742	0.0499807	4.28114e-10
ENSMUSG00000089999	Gm6485	0.032393	0.0499807	3.83414e-10
ENSMUSG00000093149	Gm23374	0.00373988	0.0479678	1.04493e-10
ENSMUSG00000078887	Gm6710	0.0481174	0.0499807	1.00977e-10
ENSMUSG00000040824	Snrpd2	0.0283791	0.0499807	4.80757e-11
ENSMUSG00000098281	Gm27529	0.00644149	0.0479678	4.48338e-11
ENSMUSG00000081485	Gm12338	0.0362731	0.0499807	2.67064e-11
ENSMUSG00000021036	Sptlc2	0.0345929	0.0499807	2.50815e-11
ENSMUSG00000078713	Tomm5	0.0468764	0.0499807	2.15218e-11
ENSMUSG00000037221	Mospd3	0.0354304	0.0499807	8.81729e-12
ENSMUSG00000094518	Gm6421	0.00642389	0.0479678	3.12715e-12
ENSMUSG00000020894	Vamp2	0.0321537	0.0499807	2.57618e-12
ENSMUSG00000040720	1110037F02Rik	0.0257466	0.0499807	7.49778e-13
ENSMUSG00000046032	Snx12	0.04872	0.0499807	6.01583e-13
ENSMUSG00000035642	Aamdc	0.0250987	0.0499807	3.83541e-13
ENSMUSG00000068706	Gm10250	0.0433114	0.0499807	2.78884e-13
ENSMUSG00000044894	Uqcrq	0.02644	0.0499807	1.74891e-13
ENSMUSG00000078652	Psme3	0.0401897	0.0499807	1.23136e-13
ENSMUSG00000081552	Gm12328	0.00648015	0.0479678	5.75441e-14
ENSMUSG00000067161	Gm5560	0.0049927	0.0479678	4.61663e-14
ENSMUSG00000038831	Ralgps1	0.0205058	0.0499807	3.04716e-14
ENSMUSG00000058392	Rrp1b	0.0385928	0.0499807	2.24496e-14
ENSMUSG00000021252	0610007P14Rik	0.0379338	0.0499807	1.40084e-14
ENSMUSG00000062458	Gm8623	0.0203466	0.0499807	7.16211e-15
ENSMUSG00000026980	Ly75	0.0180907	0.0499807	5.19125e-15
ENSMUSG00000035011	Zbtb7a	0.0322384	0.0499807	4.17716e-15
ENSMUSG00000103653	WI1-1003N17.1	0.0425118	0.0499807	2.52471e-15
ENSMUSG00000056904	Gm5620	0.00894208	0.0479678	9.13622e-16
ENSMUSG00000076437	2700094K13Rik	0.0487566	0.0499807	5.4549e-16
ENSMUSG00000091449	Gm10269	0.0466546	0.0499807	3.78821e-16
ENSMUSG00000025142	Aspscr1	0.0307415	0.0499807	2.60643e-16
ENSMUSG00000066116	Gm10154	0.0138968	0.0479678	1.73563e-16
ENSMUSG00000030591	Psmd8	0.0408873	0.0499807	1.16167e-16
ENSMUSG00000071632	2510002D24Rik	0.0279883	0.0499807	8.06942e-17
ENSMUSG00000054312	Mrps21	0.0215248	0.0499807	5.75193e-17
ENSMUSG00000028795	Ccdc28b	0.0498182	0.0499807	2.54608e-18
ENSMUSG00000094475	Gm11007	0.0476406	0.0499807	1.87867e-18
ENSMUSG00000045996	Polr2k	0.00637436	0.0479678	1.43622e-18
ENSMUSG00000053038	Gm6180	0.00021204	0.0293516	1.3193e-18
ENSMUSG00000080268	Brms1	0.0382818	0.0499807	9.0276e-19
ENSMUSG00000089782	Gm3531	0.0277309	0.0499807	8.36761e-19
ENSMUSG00000034345	Gtf2h5	0.040718	0.0499807	7.34154e-19
ENSMUSG00000015804	Med28	0.027635	0.0499807	6.41685e-19
ENSMUSG00000078453	Abracl	0.0332624	0.0499807	3.70056e-19
ENSMUSG00000031403	Dkc1	0.0366331	0.0499807	1.35319e-19
ENSMUSG00000060510	Zfp266	0.0493252	0.0499807	8.51076e-20
ENSMUSG00000067106	Gm5529	0.00337718	0.0479678	5.003e-20
ENSMUSG00000034566	Atp5h	0.0415256	0.0499807	3.81709e-20
ENSMUSG00000027651	Rprd1b	0.04422	0.0499807	3.6458e-20
ENSMUSG00000001440	Kpnb1	0.0356461	0.0499807	3.02506e-20
ENSMUSG00000071054	Safb	0.0456794	0.0499807	2.9894e-20
ENSMUSG00000038542	Pcid2	0.0407709	0.0499807	2.65582e-20
ENSMUSG00000060743	H3f3a	0.0457023	0.0499807	2.65454e-20
ENSMUSG00000037012	Hk1	0.0314759	0.0499807	2.19351e-20
ENSMUSG00000079507	H2-Q1	0.0178523	0.0499807	1.783e-20
ENSMUSG00000024260	Sap130	0.038105	0.0499807	7.91537e-21
ENSMUSG00000089929	Bcl2a1b	0.0115142	0.0479678	2.14084e-21
ENSMUSG00000060467	Gm10080	0.0467193	0.0499807	1.89303e-21
ENSMUSG00000064281	Rpl19-ps1	0.00422933	0.0479678	1.69776e-21
ENSMUSG00000074978	Actg-ps1	0.00756815	0.0479678	1.04045e-21
ENSMUSG00000059149	Mfsd4	0.00582606	0.0479678	2.24004e-22
ENSMUSG00000029063	Nadk	0.0366334	0.0499807	1.15292e-22
ENSMUSG00000035232	Pdk3	0.0351071	0.0499807	7.23289e-23
ENSMUSG00000016498	Pdcd1lg2	0.0243558	0.0499807	4.41124e-23
ENSMUSG00000030189	Ybx3	0.0222821	0.0499807	3.2772e-24
ENSMUSG00000059923	Grb2	0.0143457	0.0479678	2.9217e-24
ENSMUSG00000038155	Gstp2	0.0170573	0.0499807	2.53886e-24
ENSMUSG00000031783	Polr2c	0.0360422	0.0499807	2.12215e-24
ENSMUSG00000034487	Kdelc2	0.027826	0.0499807	1.16707e-24
ENSMUSG00000074746	Pdzd8	0.0118699	0.0479678	1.15545e-24
ENSMUSG00000058625	Gm17383	0.0119399	0.0479678	8.1485e-25
ENSMUSG00000078881	Gm14434	0.0479719	0.0499807	4.41361e-25
ENSMUSG00000068120	Gm10231	0.0174238	0.0499807	2.83482e-25
ENSMUSG00000027613	Eif6	0.0153441	0.0479678	1.82251e-25
ENSMUSG00000080859	Rpl10-ps1	0.012356	0.0479678	1.09452e-25
ENSMUSG00000020736	Nt5c	0.0138075	0.0479678	5.69184e-26
ENSMUSG00000062683	Atp5g2	0.0152101	0.0479678	1.3365e-26
ENSMUSG00000068396	Rpl34-ps1	0.0153121	0.0479678	6.42262e-27
ENSMUSG00000062997	Rpl35	0.0456549	0.0499807	3.12467e-27
ENSMUSG00000027010	Slc25a12	0.0372821	0.0499807	3.06406e-27
ENSMUSG00000080885	Rpl10-ps6	0.0156473	0.0479678	2.11239e-27
ENSMUSG00000040731	Eif4h	0.0464664	0.0499807	1.80579e-27
ENSMUSG00000032199	Polr2m	0.046089	0.0499807	1.71128e-27
ENSMUSG00000053768	Chchd3	0.00922257	0.0479678	1.56727e-27
ENSMUSG00000082809	Gm14150	0.0108786	0.0479678	7.15368e-28
ENSMUSG00000084817	Gm5526	0.0496938	0.0499807	5.78978e-29
ENSMUSG00000078300	Gm2606	0.00735623	0.0479678	5.36877e-29
ENSMUSG00000036299	BC031181	0.00204183	0.0479678	5.23927e-29
ENSMUSG00000034327	Kctd9	0.0458743	0.0499807	2.436e-29
ENSMUSG00000029649	Pomp	0.0347936	0.0499807	6.31319e-30
ENSMUSG00000067608	Pcna-ps2	0.0277579	0.0499807	3.44111e-30
ENSMUSG00000019804	Snx3	0.0230344	0.0499807	2.80936e-30
ENSMUSG00000039765	Cc2d2a	0.0307551	0.0499807	1.26171e-30
ENSMUSG00000031231	Cox7b	0.0327489	0.0499807	1.53678e-31
ENSMUSG00000030704	Rab6a	0.0393329	0.0499807	6.39855e-32
ENSMUSG00000019494	Cops6	0.0197959	0.0499807	6.28526e-32
ENSMUSG00000018932	Map2k3	0.0278065	0.0499807	1.64638e-32
ENSMUSG00000066724	Gm10175	0.0170449	0.0499807	1.60465e-32
ENSMUSG00000078886	Gm2026	0.0499807	0.0499807	1.48802e-32
ENSMUSG00000060675	Pla2g16	0.0123232	0.0479678	1.11971e-32
ENSMUSG00000024400	Wdr33	0.00813005	0.0479678	9.16366e-33
ENSMUSG00000069939	Gm12070	0.00562324	0.0479678	2.33356e-33
ENSMUSG00000030204	Ddx47	0.0102006	0.0479678	8.4498e-34
ENSMUSG00000058443	Rpl10-ps3	0.0155182	0.0479678	2.84636e-34
ENSMUSG00000027406	Idh3b	0.0377266	0.0499807	1.97185e-35
ENSMUSG00000021361	Tmem14c	0.0110599	0.0479678	3.71831e-36
ENSMUSG00000040699	Limd2	0.0471097	0.0499807	1.45097e-36
ENSMUSG00000078636	Gm7336	0.00579474	0.0479678	5.86175e-37
ENSMUSG00000011958	Bnip2	0.020058	0.0499807	3.69563e-37
ENSMUSG00000038683	Pak1ip1	0.0236727	0.0499807	1.11761e-38
ENSMUSG00000062006	Rpl34	0.0201354	0.0499807	5.80697e-39
ENSMUSG00000001418	Glmp	0.0315215	0.0499807	3.14976e-39
ENSMUSG00000096617	Gm5559	0.00602973	0.0479678	2.54666e-39
ENSMUSG00000103034	UBC	0.00143685	0.0479678	1.7157e-39
ENSMUSG00000021660	Btf3	0.0286498	0.0499807	5.59907e-40
ENSMUSG00000032093	Cd3e	0.0122964	0.0479678	8.55014e-41
ENSMUSG00000026305	Lrrfip1	0.043115	0.0499807	1.07722e-41
ENSMUSG00000035227	Spcs2	0.0366152	0.0499807	1.00787e-42
ENSMUSG00000040044	Orc3	0.0449002	0.0499807	3.9741e-43
ENSMUSG00000040483	Xaf1	0.0245094	0.0499807	2.97821e-43
ENSMUSG00000032397	Tipin	0.0435255	0.0499807	2.77007e-43
ENSMUSG00000029111	Nelfa	0.0202604	0.0499807	2.32005e-43
ENSMUSG00000020386	Sar1b	0.00984831	0.0479678	1.35438e-43
ENSMUSG00000030016	Zfml	0.0365571	0.0499807	1.00191e-43
ENSMUSG00000057554	Lgals8	0.0497506	0.0499807	6.19537e-44
ENSMUSG00000024213	Nudt3	0.0190786	0.0499807	3.55138e-45
ENSMUSG00000032047	Acat1	0.0470024	0.0499807	2.65936e-45
ENSMUSG00000021764	Ndufs4	0.002052	0.0479678	2.47241e-45
ENSMUSG00000027566	Psma7	0.00616503	0.0479678	1.58817e-45
ENSMUSG00000018286	Psmb6	0.00488942	0.0479678	7.79515e-46
ENSMUSG00000028692	Akr1a1	0.044133	0.0499807	5.96136e-48
ENSMUSG00000090553	Snrpe	0.0412367	0.0499807	3.91123e-49
ENSMUSG00000078193	Gm2000	0.0463693	0.0499807	1.94405e-49
ENSMUSG00000029860	Zyx	0.0397053	0.0499807	4.94113e-50
ENSMUSG00000020914	Top2a	0.0300462	0.0499807	3.69449e-50
ENSMUSG00000030824	Nucb1	0.0454518	0.0499807	2.06837e-50
ENSMUSG00000053898	Ech1	0.00522151	0.0479678	1.13145e-50
ENSMUSG00000063480	Nhp2l1	0.0358144	0.0499807	1.64931e-51
ENSMUSG00000030342	Cd9	0.0246726	0.0499807	1.21318e-52
ENSMUSG00000038642	Ctss	0.04962	0.0499807	6.91456e-53
ENSMUSG00000030447	Cyfip1	0.0286055	0.0499807	4.26124e-53
ENSMUSG00000060803	Gstp1	0.00289527	0.0479678	1.75272e-53
ENSMUSG00000007739	Cct4	0.010657	0.0479678	2.0521e-56
ENSMUSG00000017404	Rpl19	0.00260749	0.0479678	5.70035e-57
ENSMUSG00000090841	Myl6	0.0486799	0.0499807	4.38572e-57
ENSMUSG00000028798	Eif3i	0.0421331	0.0499807	2.06485e-57
ENSMUSG00000022500	Litaf	0.0119184	0.0479678	1.0156e-58
ENSMUSG00000028964	Park7	0.00419034	0.0479678	1.08401e-60
ENSMUSG00000053332	Gas5	0.0297548	0.0499807	6.70562e-61
ENSMUSG00000102037	Bcl2a1a	0.00717589	0.0479678	3.08278e-61
ENSMUSG00000047880	Cxcr5	0.00646251	0.0479678	2.29971e-63
ENSMUSG00000037563	Rps16	0.00607524	0.0479678	2.15411e-64
ENSMUSG00000041028	Ghitm	0.0351033	0.0499807	2.00136e-64
ENSMUSG00000027342	Pcna	0.0270255	0.0499807	1.24654e-66
ENSMUSG00000099974	Bcl2a1d	0.00485348	0.0479678	3.51845e-67
ENSMUSG00000043131	Mob1a	0.0242116	0.0499807	2.28462e-67
ENSMUSG00000071866	Ppia	0.0452416	0.0499807	1.3152e-67
ENSMUSG00000060419	Rps16-ps2	0.0073368	0.0479678	1.63572e-68
ENSMUSG00000048076	Arf1	0.02795	0.0499807	1.51852e-70
ENSMUSG00000081094	Rpl19-ps11	0.00328651	0.0479678	1.16482e-70
ENSMUSG00000030047	Arhgap25	0.0374736	0.0499807	9.81832e-72
ENSMUSG00000048163	Selplg	0.014563	0.0479678	7.1696e-72
ENSMUSG00000020738	Sumo2	0.0478652	0.0499807	4.22863e-72
ENSMUSG00000043091	Tuba1c	0.00636528	0.0479678	1.98982e-72
ENSMUSG00000063856	Gpx1	0.0336718	0.0499807	1.47436e-75
ENSMUSG00000013662	Atad1	0.0245248	0.0499807	4.43326e-87
ENSMUSG00000025428	Atp5a1	0.0375149	0.0499807	1.26024e-87
ENSMUSG00000004880	Lbr	0.0437016	0.0499807	1.11059e-87
ENSMUSG00000072620	Slfn2	0.0463386	0.0499807	1.94422e-88
ENSMUSG00000068523	Gng5	0.0229285	0.0499807	4.02379e-94
ENSMUSG00000008682	Rpl10	0.0286543	0.0499807	8.18611e-97
ENSMUSG00000057134	Ado	0.0498798	0.0499807	8.32193e-98
ENSMUSG00000043889	Gm8399	0.013037	0.0479678	3.86451e-100
ENSMUSG00000025630	Hprt	0.0232391	0.0499807	2.72788e-102
ENSMUSG00000031167	Rbm3	0.0306693	0.0499807	5.25058e-105
ENSMUSG00000035569	Ankrd11	0.034968	0.0499807	5.34187e-107
ENSMUSG00000098112	Bin2	0.0203703	0.0499807	2.20913e-108
ENSMUSG00000023004	Tuba1b	0.00776429	0.0479678	1.34704e-110
ENSMUSG00000056201	Cfl1	0.000754703	0.0479678	3.76074e-113
ENSMUSG00000068882	Ssb	0.0440297	0.0499807	1.07289e-117
ENSMUSG00000001175	Calm1	0.0336174	0.0499807	3.62695e-120
ENSMUSG00000034868	Myl12b	0.0315187	0.0499807	9.71082e-121
ENSMUSG00000067212	H2-T23	0.0102759	0.0479678	2.11722e-125
ENSMUSG00000009687	Fxyd5	0.0226181	0.0499807	2.53184e-129
ENSMUSG00000022201	Zfr	0.0374758	0.0499807	1.26385e-136
ENSMUSG00000030695	Aldoa	0.023112	0.0499807	1.17083e-137
ENSMUSG00000058013	Sep11	0.0350378	0.0499807	1.41766e-148
ENSMUSG00000022587	Ly6e	0.0410153	0.0499807	4.20606e-154
ENSMUSG00000075010	AW112010	0.0168186	0.0499807	4.2187e-158
ENSMUSG00000018293	Pfn1	0.00165716	0.0479678	7.27538e-174
ENSMUSG00000029064	Gnb1	0.00676154	0.0479678	6.16795e-180
ENSMUSG00000026285	Pdcd1	0.00139861	0.0479678	2.86933e-186
ENSMUSG00000033685	Ucp2	0.00980531	0.0479678	9.89008e-192
ENSMUSG00000000409	Lck	0.0477929	0.0499807	2.04165e-194
ENSMUSG00000054766	Set	0.0257982	0.0499807	1.04703e-205
ENSMUSG00000021939	Ctsb	0.0367157	0.0499807	1.88603e-213
ENSMUSG00000059195	Gm12715	0.0128358	0.0479678	2.26266e-227
ENSMUSG00000038014	Fam120a	0.0303324	0.0499807	1.508e-255
ENSMUSG00000027863	Cd2	1.7762e-05	0.006643	3.76696e-260
ENSMUSG00000016319	Slc25a5	0.00172675	0.0479678	3.5269e-261
ENSMUSG00000044285	Gm1821	0.0034453	0.0479678	5.09231e-287
ENSMUSG00000019505	Ubb	0.00410014	0.0479678	0
ENSMUSG00000049775	Tmsb4x	0.00500588	0.0479678	0
ENSMUSG00000020368	Canx	0.00894808	0.0479678	0
ENSMUSG00000073411	H2-D1	0.0144819	0.0479678	0
ENSMUSG00000068823	Csde1	0.0189814	0.0499807	0
